# Supplementary material
Source: Elsevier journal article supplement (https://www.sciencedirect.com/science/article/pii/S2531137922000840)
Supplement: mmc2 [file S2531137922000840:mmc2.pdf]

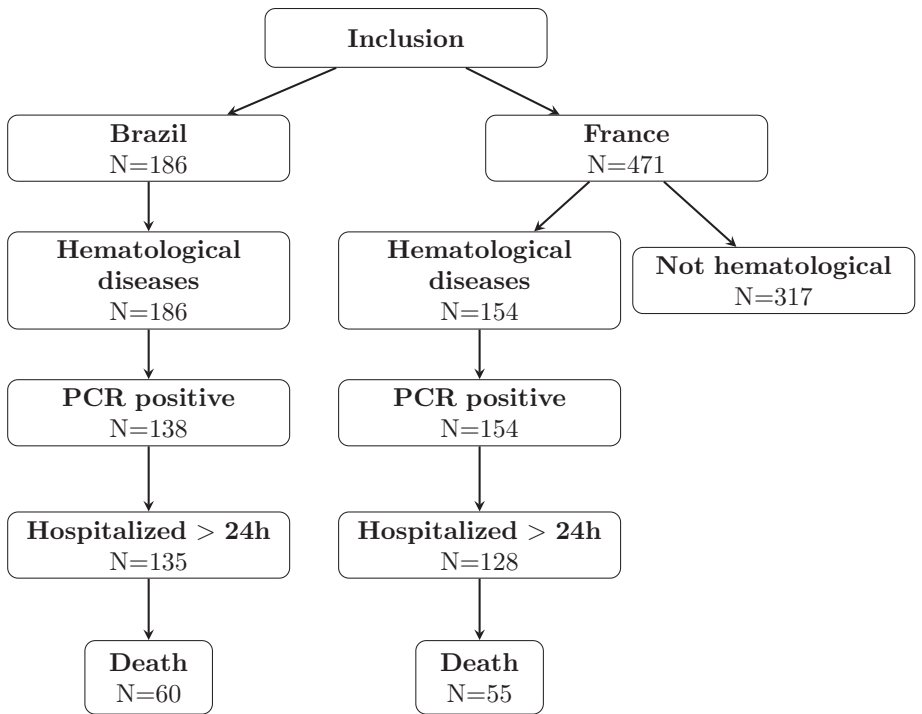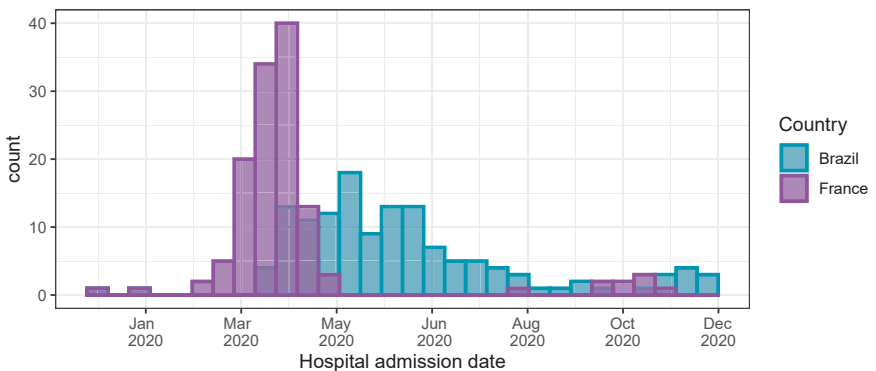

**Supplementary Figure 1:** Flow Chart of the study and histogram of the hospital admission dates according to country origin
